# Supplementary material
Source: PubMed Central journal article supplement (PMC8218246)
Supplement: NIHMS1525388-supplement-2.pdf [file NIHMS1525388-supplement-2.pdf]

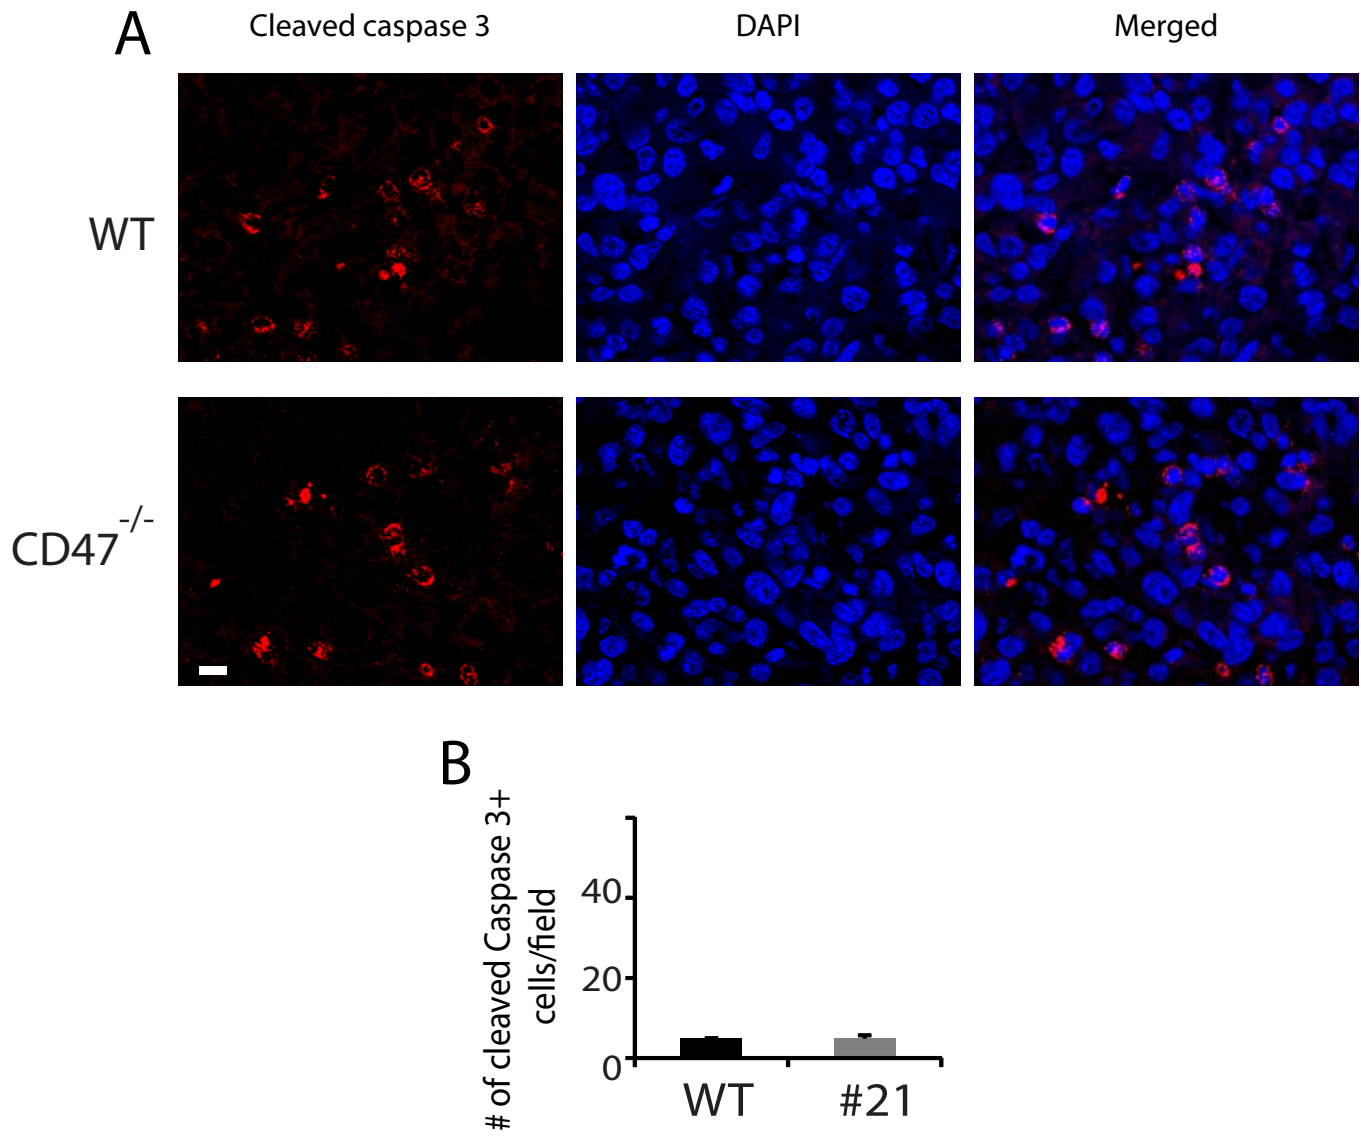

**Figure S1.** A. Cleaved caspase 3 staining in CD47 WT and CD47 KO xenografts. B. Quantification of the staining showed no difference between these two groups. Bar=20  $\mu$ m. N=8.
