# Supplementary material
Source: PubMed Central journal article supplement (PMC8218246)
Supplement: NIHMS1525388-supplement-4.pdf [file NIHMS1525388-supplement-4.pdf]

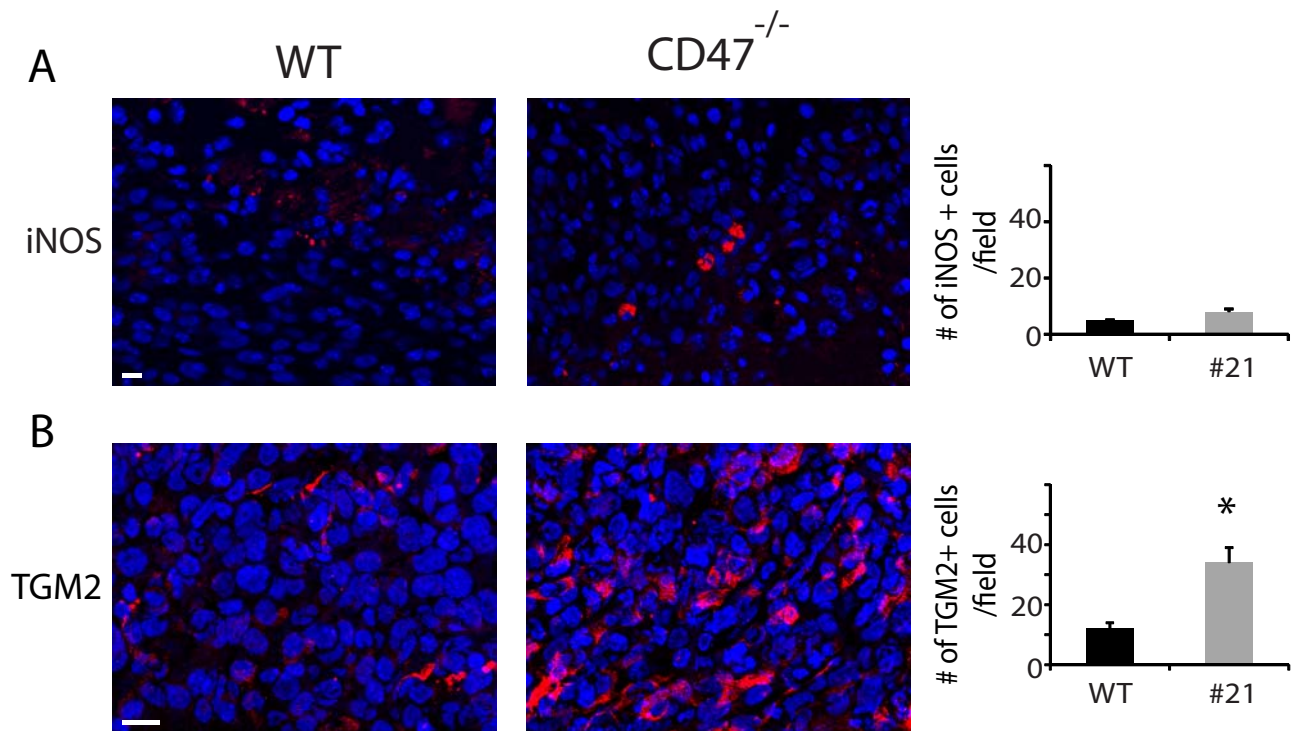

**Figure S3.** A. iNOS staining in CD47 WT and CD47 KO xenografts and quantification. B. TGM2 staining in CD47 WT and CD47 KO xenografts and quantification. Bar=20  $\mu$ m. N=8. \*: P<0.05.
