# Supplementary material
Source: PubMed Central journal article supplement (PMC8218246)
Supplement: NIHMS1525388-supplement-6.pdf [file NIHMS1525388-supplement-6.pdf]

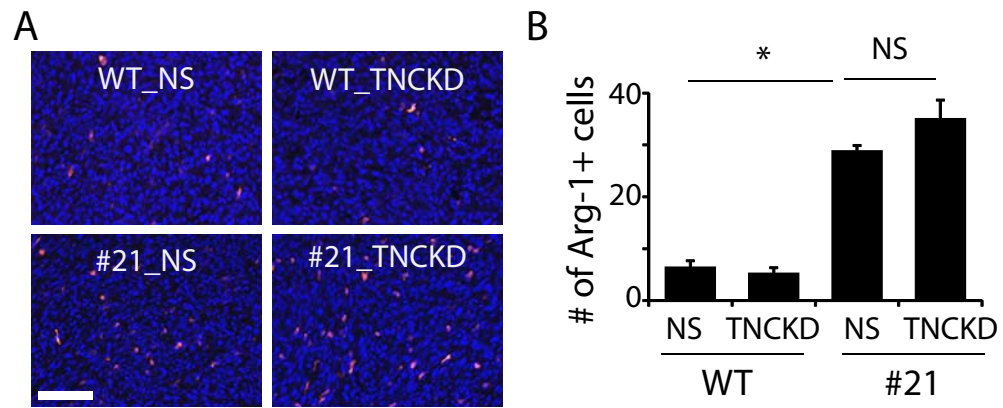

Figure S5. A. Arg-1 staining in xenografts from CD47 WT +/- TNC KD, and CD KO +/- TNC KD. B. Number of Arg-1+ cells in xenografts. \*:  $P < 0.05$ . Bar=100  $\mu$ m, n=5.
