# Supplementary material
Source: PubMed Central journal article supplement (PMC8218246)

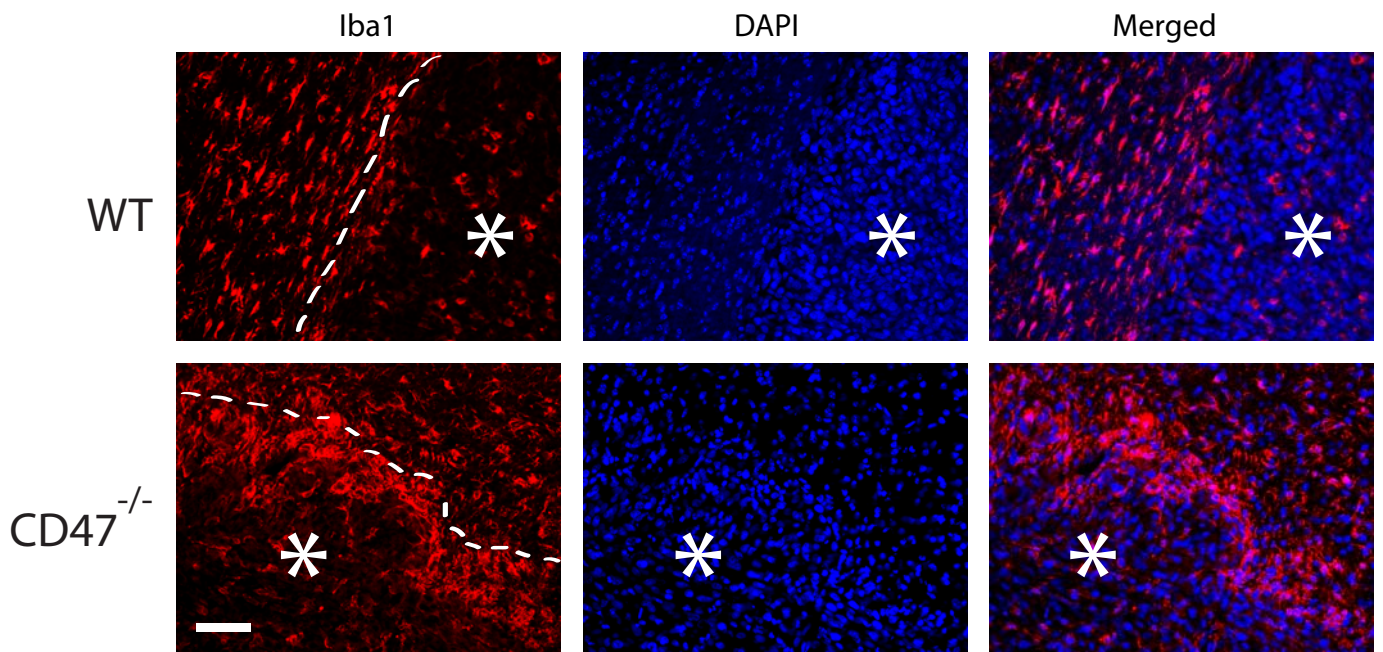

**Figure S2.** Iba-1 staining showing TAMs accumulated at tumor edges. \*: tumor side. Bar=100 um.

Supplement: NIHMS1525388-supplement-3.pdf [file NIHMS1525388-supplement-3.pdf]

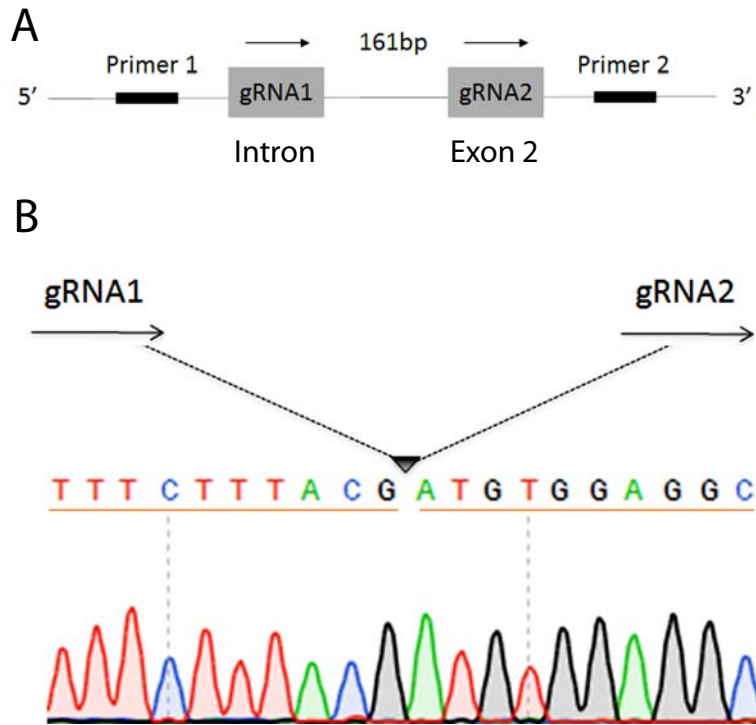

Figure S4. Sanger sequencing of GL261 clone 29 showing deletion of part of the mouse CD47 coding sequence.

Supplement: NIHMS1525388-supplement-5.pdf [file NIHMS1525388-supplement-5.pdf]
